# Supplementary material for: Autumn ichthyoplankton assemblage in the Yangtze Estuary shaped by environmental factors
Source: PeerJ. 2016 Apr 19;4:e1922. doi: 10.7717/peerj.1922 (PMC4841249; doi:10.7717/peerj.1922)
Supplement: Data S2 [file peerj-04-1922-s003.xls]

## Sheet: 原始数据
	白氏银汉鱼	赤鼻棱鳀	带鱼	刀鲚	鲷科一种	方氏云鳚	凤鲚	寡鳞飘鱼	红狼牙鰕虎鱼	虎鲉	花斑蛇鲻	花鲈	黄姑鱼	黄鲫	尖海龙	康氏小公鱼	龙头鱼	麦穗鱼	矛尾鰕虎鱼	美肩鳃鳚	七星底灯鱼	七星鳢	前颌间银鱼	青带小公鱼	鳀鱼	细条天竺鲷	小黄鱼	银飘鱼	有明银鱼	中华鱵	(鱼衔)科	sp鱼卵	犬牙细棘鰕虎鱼
A15	0	0	0	0			0	0		0		0			0	1	0	0	0	0	0	0	0	0	0	0		0	0	0		0		1
A16	0	0	0	0			0	0		0		0			0	5	0	0	0	0	0	0	0	0	0	0		0	0	0		0		5
A22	0	0	0	0			1	0		0		0			0	0	0	0	0	0	0	0	0	0	0	0		0	0	0		0		1
A24	0	0	0	0			0	0		0		0			0	1	0	0	0	0	0	0	0	0	0	0		0	0	0		0		1
A30	0	0	0	0			0	0		0		0			0	5	0	0	0	0	0	0	0	0	0	0		0	0	0		0		5
A35	0	0	0	0			0	0		0		0			0	0	0	7	0	0	0	0	0	0	0	0		0	0	0		0		7
A36	0	0	0	0			0	0		0		0			0	0	0	6	0	0	0	0	0	0	0	0		0	0	0		0		6
A37	0	0	0	0			0	0		0		0			0	0	0	9	0	0	0	0	0	0	0	0		0	0	0		0		9
B1	0	0	0	0			0	0		0		0			0	0	0	0	0	0	0	0	0	0	0	0		0	0	0		0		0
B2	0	0	0	0			0	0		0		1			0	0	0	0	0	0	0	0	0	0	4	0		0	0	0		0		5
B3	0	0	0	0			0	0		0		0			0	0	0	0	0	0	0	0	0	0	2	0		0	0	0		0		2
B5	0	0	0	0			0	0		0		4			0	0	0	0	0	0	0	0	0	0	0	0		0	0	0		0		4
B6	0	0	0	0			0	0		0		0			0	0	2	0	0	0	0	0	0	0	0	0		0	0	0		0		2
B7	0	0	0	0			0	0		0		0			0	0	1	0	0	0	0	0	0	0	0	0		0	0	0		0		1
B12	0	0	0	0			0	0		0		0			0	0	0	0	0	0	0	0	0	0	1	0		0	0	0		0		1
B15	0	0	0	0			0	0		0		0			0	0	0	0	0	0	0	0	0	0	0	0		0	3	0		0		3
B18	0	0	0	0			0	0		0		0			0	0	0	0	0	0	0	1	0	0	0	0		0	0	0		0		1
B19	0	0	0	0			0	0		0		0			0	1	0	0	0	0	0	0	0	0	0	0		0	0	0		0		1
B22	0	0	0	0			0	0		0		0			0	0	0	0	0	0	0	0	0	0	0	0		0	1	0		0		1
B24	0	0	0	0			0	0		0		0			0	0	0	0	0	0	0	0	0	0	0	0		0	1	0		0		1
B26	0	0	0	0			0	0		0		0			0	0	3	0	0	0	0	2	0	0	0	0		0	0	0		0		5
B36	0	0	0	0			0	0		0		0			0	0	0	0	0	0	0	0	0	0	0	0		1	0	0		0		1
B37	0	0	0	0			0	5		0		0			0	0	0	0	0	0	0	0	0	0	0	0		0	0	0		0		5
B39	0	0	0	0			0	1		0		0			0	0	0	0	0	0	0	0	0	0	0	0		0	6	0		0		7
B40	0	0	0	0			0	0		0		0			0	0	0	0	0	0	0	0	0	0	0	0		0	1	0		0		1
C1	0	0	0	0			0	0		0		0			0	0	1	0	0	0	0	0	0	0	0	0		0	0	0		0		1
C3	0	0	0	0			0	0		0		1			0	0	2	0	0	0	0	0	0	0	0	0		0	0	0		0		3
C4	0	0	1	0			0	0		0		0			0	0	0	0	0	0	0	0	0	0	0	0		0	0	0		0		1
C7	0	0	8	0			0	0		0		0			0	0	0	0	0	0	0	0	0	0	0	0		0	0	0		0		8
C8	0	0	8	0			0	0		0		0			0	0	0	0	0	0	0	1	0	0	0	0		0	0	0		0		9
C10	0	0	0	0			0	0		0		0			0	0	0	0	0	0	0	0	0	0	0	0		0	0	0		1		1
C12	0	0	3	0			0	0		0		0			0	0	0	0	0	0	0	0	0	0	0	0		0	0	0		0		3
C13	0	0	1	0			0	0		0		0			0	0	0	0	0	0	0	0	0	0	0	0		0	0	0		0		1
C14	0	0	3	0			0	0		0		0			0	0	0	0	0	0	0	0	0	0	0	0		0	0	0		0		3
C19	0	0	0	0			0	0		0		2			0	0	0	0	0	0	0	0	0	0	2	0		0	1	0		5		10
C20	0	0	0	0			0	0		0		0			0	0	0	0	0	0	0	1	0	0	0	0		0	0	0		0		1
C27	0	0	0	0			0	0		0		0			0	0	0	0	0	0	0	0	0	0	0	0		0	0	0		1		1
C30	0	0	0	0			0	0		0		0			5	0	0	0	0	0	0	0	0	0	0	0		0	0	0		1		6
C32	0	0	0	0			0	0		0		1			0	0	0	0	0	0	0	0	0	0	0	0		0	0	0		0		1
C33	0	0	0	0			0	0		0		0			0	0	0	0	0	0	0	0	0	0	0	0		0	1	0		0		1
D6	0	0	0	0			0	0		0		0			0	1	0	0	0	0	0	0	0	0	0	0		0	0	0		0		1
D10	0	0	0	0			0	0		0		0			0	20	0	0	0	0	0	0	0	0	0	0		0	0	0		0		20
D11	0	0	0	0			0	0		0		0			0	1	0	0	0	0	0	0	0	0	0	0		0	0	0		0		1
D12	0	0	0	0			0	0		0		0			0	0	0	0	0	0	0	0	0	1	0	0		0	0	0		0		1
D13	0	0	0	0			0	0		0		0			0	0	0	0	0	0	0	0	0	1	0	0		0	0	0		0		1
D14	0	0	0	0			0	0		0		0			0	0	0	0	0	0	1	0	0	0	0	0		0	0	0		0		1
D16	0	0	0	0			0	0		0		0			0	1	0	0	0	0	0	0	0	0	0	0		0	0	0		0		1
D17	0	0	0	0			0	0		0		0			0	42	0	0	0	0	0	0	0	0	0	0		0	0	0		0		42
D19	0	0	0	0			0	0		0		0			0	1	0	0	0	0	0	0	0	0	0	0		0	0	0		0		1
D24	0	0	0	0			0	0		0		0			0	1	1	0	0	0	0	0	0	0	0	0		0	0	0		0		2
D29	0	0	0	0			0	0		0		0			0	0	0	0	0	0	0	0	0	0	2	0		0	0	0		0		2
D34	0	0	0	0			0	0		0		0			0	0	0	0	0	0	1	0	0	0	0	0		0	0	0		0		1
D46	0	0	0	0			0	0		0		0			0	3	0	0	0	0	1	0	0	0	0	0		0	0	0		0		4
E3	0	0	0	0			0	0		0		0			0	1	0	0	0	0	0	0	0	0	0	0		0	1	0		0		2
E9	0	0	0	0			0	0		0		0			0	0	0	0	0	0	0	0	0	0	0	0		0	1	0		0		1
E10	0	0	0	0			0	0		0		0			0	0	0	0	0	0	0	0	0	0	0	0		0	22	0		0		22
E11	0	0	0	0			0	0		0		0			0	1	0	0	0	0	0	0	0	0	0	0		0	0	0		0		1
E16	0	0	0	0			0	0		0		0			0	6	1	0	0	0	0	0	0	0	0	0		0	0	0		0		7
E22	0	0	0	0			0	0		0		0			0	2	0	0	0	0	0	0	0	0	0	0		0	0	0		0		2
E25	0	0	0	0			0	0		0		0			0	2	0	0	0	0	0	0	0	0	0	0		0	0	0		0		2
E26	0	0	0	0			0	0		0		0			0	7	0	0	0	0	0	0	0	0	0	0		0	0	0		0		7
E29	0	0	0	0			0	0		0		0			0	0	0	0	0	0	0	0	0	0	1	0		0	0	0		0		1
E36	0	0	0	0			0	0		0		0			0	0	0	0	0	0	0	0	0	0	0	0		4	0	0		0		4
F4	0	0	0	0			0	0		0		0			0	0	0	0	0	0	0	0	0	0	0	0		0	0	0		1		1
F6	0	0	0	0			0	0		0		0			0	0	0	0	0	0	0	0	0	0	1	0		0	0	0		0		1
F7	0	0	0	0			0	0		0		0			0	0	0	0	0	0	0	0	0	0	0	0		0	0	0		1		1
F8	0	0	0	0			0	0		0		0			0	0	1	0	0	0	0	0	0	0	0	0		0	0	0		1		2
F10	0	1	0	0			0	0		0		0			0	0	0	0	0	0	0	0	0	0	0	0		0	0	0		0		1
F11	0	1	0	0			0	0		0		0			0	0	0	0	0	0	0	0	0	0	7	0		0	0	0		0		8
F12	0	0	0	0			1	0		0		0			0	0	0	0	0	0	0	0	0	0	3	0		0	0	0		0		4
F14	0	0	0	0			0	0		0		0			0	0	0	0	0	0	0	0	0	0	0	0		0	0	0		1		1
F16	0	0	0	0			0	0		0		0			0	0	2	0	0	0	0	0	0	0	0	0		0	0	0		0		2
F17	0	0	0	0			0	0		0		0			0	0	0	0	0	0	0	0	0	0	3	0		0	0	0		0		3
F21	0	0	0	0			0	0		0		0			0	0	0	0	0	0	0	0	7	0	0	0		0	0	0		0		7
F22	0	0	0	0			0	0		0		0			1	0	0	0	8	0	0	0	0	0	3	0		0	0	0		0		12
F23	0	0	0	0			2	0		0		0			3	0	0	0	0	0	0	0	8	0	40	0		0	0	0		0		53
F25	0	0	0	0			0	0		0		0			0	0	0	0	0	0	0	0	0	0	6	0		0	0	0		0		6
F26	0	0	0	0			0	0		2		0			0	0	0	0	0	0	8	0	0	0	0	2		0	0	0		0		12
F28	0	0	0	0			6	0		0		0			0	0	0	0	0	0	1	0	20	0	6	0		0	0	0		0		33
F29	0	0	0	0			4	0		0		0			0	0	0	0	0	0	0	0	8	0	16	0		0	0	0		0		28
F30	0	0	0	0			0	0		0		0			0	0	0	0	0	0	0	0	1	0	1	0		0	0	0		0		2
F32	1	0	0	0			0	0		0		0			0	0	0	0	0	0	0	0	0	0	4	0		0	0	0		0		5
F36	0	0	0	0			0	0		0		0			0	0	0	0	0	0	0	0	56	0	0	0		1	0	0		0		57
F37	0	0	0	0			0	0		0		0			0	0	0	0	94	0	0	0	0	0	0	0		0	0	0		0		94
F38	0	0	0	0			0	0		0		0			0	0	0	0	12	0	0	0	0	0	0	0		0	0	0		0		12
F39	0	0	0	0			2	0		0		0			0	0	0	0	40	0	0	0	0	0	0	0		0	0	0		0		42
F40	0	0	0	0			0	0		0		0			0	0	0	0	0	0	0	0	63	0	0	0		0	0	0		0		63
F41	0	0	0	0			0	0		0		0			0	0	1	0	0	0	0	0	3	0	1	0		0	0	0		0		5
G2	0	0	28	0			0	0		0		0			0	0	0	0	0	0	0	0	0	0	0	0		0	0	0		0		28
G3	0	0	1	0			0	0		0		0			0	0	0	0	0	0	0	0	0	0	0	0		0	0	0		0		1
G4	0	0	4	0			0	0		0		0			0	0	0	0	0	0	0	0	0	0	0	0		0	0	0		0		4
G6	0	4	22	0			0	0		0		0			0	0	0	0	0	0	0	0	0	0	0	0		0	0	0		0		26
G7	1	0	0	0			0	0		0		0			0	0	0	0	0	0	0	0	0	0	0	0		0	0	3		0		4
G9	0	1	0	0			0	0		0		0			1	0	0	0	0	0	0	0	0	0	0	0		0	0	0		0		2
G10	0	2	0	2			0	0		0		0			0	0	1	0	0	0	0	0	0	0	0	0		0	0	0		0		5
G11	0	1	2	0			0	0		0		0			0	0	1	0	0	0	0	0	0	0	0	0		0	0	0		0		4
G13	0	3	0	0			0	0		0		0			0	0	0	0	0	0	0	0	0	0	0	0		0	0	0		0		3
G14	0	0	1	0			0	0		0		0			0	0	0	0	0	0	0	0	0	0	0	0		0	0	0		0		1
G15	0	0	0	0			0	0		0		0			2	0	0	0	0	0	0	0	0	0	0	0		0	0	0		0		2
G16	0	0	0	1			0	0		0		0			0	0	0	0	1	0	0	0	0	0	0	0		0	0	0		0		2
G17	0	0	4	0			0	0		0		0			0	0	1	0	0	0	0	0	0	0	0	0		0	0	0		0		5
G19	0	0	17	0			0	0		0		0			0	0	0	0	0	0	0	0	0	0	0	0		0	0	0		0		17
G20	0	1	0	0			0	0		0		0			0	0	0	0	0	0	0	0	0	0	0	0		0	0	0		0		1
G23	0	0	0	0			0	0		0		0			1	0	0	0	0	0	0	0	0	0	0	0		0	0	0		0		1
G25	0	0	1	0			0	0		0		0			0	0	0	0	0	0	0	0	0	0	0	0		0	0	0		0		1
G26	0	0	3	0			0	0		0		0			0	0	0	0	0	0	0	0	0	0	0	0		0	0	0		0		3
G27	0	0	12	0			0	0		0		0			0	0	0	0	0	0	0	0	0	0	0	0		0	0	0		0		12
G31	0	0	2	0			0	0		0		0			0	0	0	0	0	0	0	0	0	0	0	0		0	0	0		0		2
G32	0	0	7	0			0	0		0		0			0	0	0	0	0	0	0	0	0	0	0	0		0	0	0		0		7
G33	0	0	60	0			0	0		0		0			0	0	0	0	0	0	0	0	0	0	0	0		0	0	0		0		60
G35	0	0	0	0			0	0		0		0			0	0	0	1	0	0	0	0	0	0	0	0		0	0	0		0		1
G37	0	0	0	0			0	0		0		0			0	0	0	5	0	0	0	0	0	0	0	0		0	0	0		0		5
G38	0	0	0	1			0	0		0		0			0	0	0	1	0	0	0	0	0	0	0	0		0	0	0		0		2
G40	0	0	0	0			0	0		0		0			0	0	4	0	0	0	0	0	0	0	0	0		0	0	0		0		4
G41	0	0	0	1			0	0		0		0			0	0	1	0	0	0	0	0	0	0	0	0		0	0	0		0		2
G42	0	0	4	0			0	0		0		0			0	0	0	0	0	0	0	0	0	0	0	0		0	0	0		0		4
G43	0	0	19	0			0	0		0		0			0	0	0	0	0	2	0	0	0	0	0	0		0	0	0		0		21
	2	14	211	5			16	6		2		9			13	102	23	29	155	2	12	5	166	2	103	2		6	38	3		12		938
	白氏银汉鱼Hypoatherina valenciennei
	赤鼻棱鳀Thryssa kammalensis
	带鱼Trichiurus lepturus
	刀鲚Coilia nasus
	鲷科（未定种）Sparidae sp.
	方氏云鳚Pholis fangi
	凤鲚C. mystus
	寡鳞飘鱼Pseudolaubuca engraulis
	红狼牙鰕虎鱼Odontamblyopus rubicundus
	虎鲉Minous monodactylus
	花斑蛇鲻Saurida undosquamis
	花鲈Lateolabrax japonicus
	黄姑鱼Argyrosomus japonicus
	黄鲫Setipinna taty
	尖海龙Syngnathus acus
	康氏小公鱼S. commersonnii
	龙头鱼Harpadon nehereus
	麦穗鱼Pseudorasbora parva
	矛尾鰕虎鱼Chaeturichthys stigmatias
	美肩鳃鳚Omobranchus elegans
	七星底灯鱼Benthosema pterotum
	七星鳢Channa asiatica
	前颌间银鱼Hemisalanx prognathus
	青带小公鱼Stolephorus zollingeri
	鳀 Engraulis japonicus
	细条天竺鲷Apogon lineatus
	小黄鱼Larimichthys polyactisa
	银飘鱼P. sinensis
	有明银鱼Salanx ariskensis
	中华鱵Hyporhamphus limbatus
	(鱼衔)科（未定种）Callionymidae.
	犬牙细棘鰕虎鱼Acentrogobius caninus
	sp1
